# Supplementary material for: Towards a framework for the scale-up of rehabilitation for patients with non-communicable disease in low-resource settings
Source: medRxiv preprint, doi:10.1101/2022.08.03.22278360, version 1 (2022-08-03)
Supplement: Supplemental File 1 [file 278360_file02.docx]

P1 (1–13)(14–27)(28–43)(44–62)(63–81)(82–113)(114–144)

1. Abdelhalem AM, Shabana AM, Onsy AM, Gaafar AE. High intensity interval training exercise as a novel protocol for cardiac rehabilitation program in ischemic Egyptian patients with mild left ventricular dysfunction. Egyptian Heart Journal. 2018 Dec;70(4):287-294;

2. Ajiboye OA, Anigbogu CN, Ajuluchukwu JN, Jaja SI. Exercise training improves functional walking capacity and activity level of Nigerians with chronic biventricular heart failure. Hong Kong Physiotherapy Journal. 2015;33(1):42–9.

3. Ali MS, Talwar D, Jain SK. The effect of a short-term pulmonary rehabilitation on exercise capacity and quality of life in patients hospitalised with acute exacerbation of chronic obstructive pulmonary disease. Indian Journal of Chest Diseases & Allied Sciences. 2014;56(1):13–9.

4. Babu AS, Noone MS, Haneef M, Naryanan SM. Protocol-Guided Phase-1 Cardiac Rehabilitation in Patients with ST-Elevation Myocardial Infarction in A Rural Hospital. Heart Views. 2010;11(2):52–6.

5. Babu AS, Maiya AG, George MM, Padmakumar R, Guddattu V. Effects of Combined Early In-Patient Cardiac Rehabilitation and Structured Home-based Program on Function among Patients with Congestive Heart Failure: A Randomized Controlled Trial. Heart Views. 2011;12(3):99–103.

6. Basri R, Tahir M, Naseem M. Short-term effects of chest physiotherapy in acute exacerbation of chronic obstructive pulmonary disease. Journal of Medical Sciences (Peshawar). 2017 Jul;25(3):323–7.

7. Bhattacharyya P, Ghosh R, Saha D, Chakraborty B, Bhattacharyya P, Sarma M, et al. The impact on health status in short- and long-terms of a novel and non-orthodox real-world COPD rehabilitation effort in rural India: An appraisal. International Journal of COPD. 2018;13:3313–9.

8. Biswas R, Bhattacharya M, Biswas A, Kumar S. The Effect of Exercises with Relaxation Technique on Quality of Life Improvements in Cancer Haematology Patients Following Chemotherapy. Indian Journal of Physiotherapy & Occupational Therapy. 2017;11(2):120–4.

9. Burner ER, Menchine MD, Kubicek K, Robles M, Arora S. Perceptions of successful cues to action and opportunities to augment behavioral triggers in diabetes self-management: qualitative analysis of a mobile intervention for low-income Latinos with diabetes. J Med Internet Res. 2014 Jan 29;16(1):e25.

10. Chakraborty K, Das M, Mandal P, Sarkar U, Ballav A, Barman A, et al. A Comparative Study on the Effects of Comprehensive Rehabilitation in Uncomplicated Coronary Artery Bypass Grafting Patients from Rural and Urban India. IJPMR. 2007;18(2):34–40.

11. Chi-Jane W, Fetzer SJ, Yi-Ching Y, Wen-Ling W. The Efficacy of Using Self-Monitoring Diaries in a Weight Loss Program for Chronically Obese Adults in a Rural Area. Journal of Nursing Research (Lippincott Williams & Wilkins). 2012;20(3):181–8.

12. Chockalingam P, Sakthi Vinayagam N, Ezhil Vani N, Chockalingam V. Outcomes of a multidisciplinary coronary heart disease prevention programme in southern India. Heart Asia. 2016;8(2):39–44.

13. Chung B, Kim D, Nam EW. Evaluation of hypertension prevention and control programs in Lima, Peru. Osong Public Health and Research Perspectives. 2018;9(1):36–41.

14. Daabis R, Hassan M, Zidan M. Endurance and strength training in pulmonary rehabilitation for COPD patients. Egyptian journal of chest diseases and tuberculosis. 2017;66(2):231–6.

15. Davis TC, Seligman HK, Dewalt DA, Platt DJ, Reynolds C, Timm DF, et al. Diabetes Implementation of a Self-management Program in Resource Poor and Rural Community Clinics. J Prim Care Community Health. 2012;3(4):239–42.

16. Debussche X, Besancon S, Balcou-Debussche M, Ferdynus C, Delisle H, Huiart L, et al. Structured peer-led diabetes self-management and support in a low-income country: The ST2EP randomised controlled trial in Mali. PLoS One. 2018;13(1):e0191262.

17. Dehdari T, Heidarnia A, Ramezankhani A, Sadeghian S, Ghofranipour F. Effects of progressive muscular relaxation training on quality of life in anxious patients after coronary artery bypass graft surgery. Indian Journal of Medical Research. 2009;129(5):603–8.

18. Dhameja K, Singh S, Mustafa MD, Singh KP, Banerjee BD, Agarwal M, et al. Therapeutic effect of yoga in patients with hypertension with reference to GST gene polymorphism. Journal of Alternative & Complementary Medicine. 2013;19(3):243–9.

19. Edla SR, Kumar AMV, Srinivas B, Raju MS, Gupta V. “Integrated Naturopathy and Yoga” reduces blood pressure and the need for medications among a cohort of hypertensive patients in South India: 3-months follow-up study. Advances in Integrative Medicine. 2016;3(3):90–7.

20. El Demerdash S, Khorshid H, Salah I, Abdel-Rahman MA, Salem AM. Cardiac rehabilitation improves the ischemic burden in patients with ischemic heart disease who are not suitable for revascularization. Cardiovascular Revascularization Medicine. 2015;16(5):280–3.

21. El-Helow MR, Zamzam ML, Fathalla MM, El-Badawy MA, El Nahhas N, El-Nabil LM, et al. Efficacy of modified constraint-induced movement therapy in acute stroke. European journal of physical & rehabilitation medicine. 2015;51(4):371–9.

22. Elshazly A, Khorshid H, Hanna H, Ali A. Effect of exercise training on heart rate recovery in patients post anterior myocardial infarction. Egyptian Heart Journal. 2018 Dec;70(4):283-285;

23. Embarak S, Mansour W, Mortada MA. Pulmonary rehabilitation slows the decline in forced expiratory volume in 1 second and improves body mass index in patients with chronic obstructive pulmonary disease. Egyptian journal of chest diseases and tuberculosis. 2015;64(1):41–5.

24. Eraballi A, Raghuram N, Ramarao NH, Pradhan B, Rao PV. Yoga based lifestyle program in improving quality of life after coronary artery bypass graft surgery: A randomised controlled trial. Journal of Clinical and Diagnostic Research. 2018 Mar 1;12(3):YC05–9.

25. Essien O, Otu A, Umoh V, Enang O, Hicks JP, Walley J. Intensive Patient Education Improves Glycaemic Control in Diabetes Compared to Conventional Education: A Randomised Controlled Trial in a Nigerian Tertiary Care Hospital. PLoS One. 2017;12(1):e0168835.

26. Evans-Hudnall GL, Stanley MA, Clark AN, Bush AL, Resnicow K, Liu Y, et al. Improving secondary stroke self-care among underserved ethnic minority individuals: a randomized clinical trial of a pilot intervention. Journal of Behavioral Medicine. 2014;37(2):196–204.

27. Flood D, Hawkins J, Rohloff P. A Home-Based Type 2 Diabetes Self-Management Intervention in Rural Guatemala. Prev Chronic Dis. 2017 Aug 10;14:E65.

28. Ghanem M, Elaal EA, Mehany M, Tolba K. Home-based pulmonary rehabilitation program: Effect on exercise tolerance and quality of life in chronic obstructive pulmonary disease patients. Annals of Thoracic Medicine. 2010;5(1):18–25.

29. Ghashghaei FE, Sadeghi M, Rabiei K, Roohafza H, Sarrafzadegan N. Gender differences in risk factors of obese patients after cardiac rehabilitation program. Iranian Journal of Nursing and Midwifery Research. 2012;17(5):381–5.

30. Gupta L, Ghataliya SP, Anand AK, Dixit R. Effect of yoga training in hypertensive patients. Indian Journal of Applied-Basic Medical Sciences. 2011;13(16):383–6.

31. Haddad NS, Istepanian R, Philip N, Khazaal FAK, Hamdan TA, Pickles T, et al. A feasibility study of mobile phone text messaging to support education and management of type 2 diabetes in Iraq. Diabetes Technol Ther. 2014 Jul;16(7):454–9.

32. Hassan AM, El Nahas NG. Efficacy of cardiac rehabilitation after percutaneous coronary intervention. International Journal of PharmTech Research. 2016;9(4):134–41.

33. Hassan M, Mourad S, Abdel Wahab NH, Daabis R, Younis G. Effect of comorbidities on response to pulmonary rehabilitation in patients with chronic obstructive pulmonary disease. Egyptian journal of chest diseases and tuberculosis. 2016;65(1):63–9.

34. Jayasheela H, Sivabalan T. Effect of Pulmonary Rehabilitation on Quality of Life among the Chronic Obstructive Disease Patients Admitted at Pravara Rural Hospital, Loni (Bk). International Journal of Nursing Education. 2017;9(2):102–7.

35. Jayasuriya R, Pinidiyapathirage MJ, Jayawardena R, Kasturiratne A, de Zoysa P, Godamunne P, et al. Translational research for Diabetes Self-Management in Sri Lanka: A randomized controlled trial. Primary care diabetes. 2015;9(5):338–45.

36. Johnson MJ, Montes S, Bustamante K. TheraDrive in a robot gym: Toward stroke rehabilitation beyond inpatient rehabilitation settings in USA and Mexico. In 2014. p. 307–11.

37. Jyotsna VP, Ambekar S, Singla R, Joshi A, Dhawan A, Kumar N, et al. Cardiac autonomic function in patients with diabetes improves with practice of comprehensive yogic breathing program. Indian Journal of Endocrinology and Metabolism. 2013;17(3):480–5.

38. Karimi H, Rehman SSU, Gillani SA. Effects of Supervised Structured Aerobic Exercise Training Program on Interleukin-6, Nitric Oxide Synthase-1, and Cyclooxygenase-2 in Type 2 Diabetes Mellitus. Jcpsp, Journal of the College of Physicians & Surgeons - Pakistan. 2017;27(6):352–5.

39. Kitzman P, Hudson K, Sylvia V, Feltner F, Lovins J. Care Coordination for Community Transitions for Individuals Post-stroke Returning to Low-Resource Rural Communities. J Community Health. 2017 Jun;42(3):565–72.

40. Ko IS, Lee TH, Kim GS, Kang SW, Kim MJ. Effects of visiting nurses’ individually tailored education for low-income adult diabetic patients in Korea. Public Health Nursing. 2011;28(5):429–37.

41. Ku GM, Kegels G. Effects of the First Line Diabetes Care (FiLDCare) self-management education and support project on knowledge, attitudes, perceptions, self-management practices and glycaemic control: a quasi-experimental study conducted in the Northern Philippines. BMJ Open. 2014;4(8):e005317.

42. Lee TC, Frangos SN, Torres M, Winckler B, Ji SG, Dow E. Integrating Undergraduate Patient Partners into Diabetes self-management education: Evaluating a free clinic pilot program for the Underserved. J Health Care Poor Underserved. 2016;27(4):1689–708.

43. Lindley RI, Anderson CS, Billot L, Forster A, Hackett ML, Harvey LA, et al. Family-led rehabilitation after stroke in India (ATTEND): a randomised controlled trial. The Lancet. 2017;390(10094):588–99.

44. Maharaj SS, Nuhu JM. Rebound exercise: A beneficial adjuvant for sedentary non-insulin-dependent type 2 diabetic individuals in a rural environment. Australian Journal of Rural Health. 2016;24(2):123–9.

45. Masrul, Decroli E, Purnakarya I, Lipoeto NI. Effect of modified diet and exercise on insulin level in diabetes mellitus type-2 patients. Pakistan Journal of Nutrition. 2016;15(4):370–3.

46. Mayer-Davis EJ, D’Antonio AM, Smith SM, Kirkner G, Martin SL, Parra-Medina D, et al. Pounds Off With Empowerment (POWER): a clinical trial of weight management strategies for Black and White adults with diabetes who live in medically underserved rural communities. American Journal of Public Health. 2004;94(10):1736–42.

47. Mehani SH. Correlation between changes in diastolic dysfunction and health-related quality of life after cardiac rehabilitation program in dilated cardiomyopathy. Journal of Advanced Research. 2013;4(2):189–200.

48. Mohammed HG, Shabana AM. Effect of cardiac rehabilitation on cardiovascular risk factors in chronic heart failure patients. Egyptian Heart Journal. 2018 Jun;70(2):77–82.

49. Moncrieft AE, Llabre MM, McCalla JR, Gutt M, Mendez AJ, Gellman MD, et al. Effects of a Multicomponent Life-Style Intervention on Weight, Glycemic Control, Depressive Symptoms, and Renal Function in Low-Income, Minority Patients With Type 2 Diabetes: Results of the Community Approach to Lifestyle Modification for Diabetes Randomized Controlled Trial. Psychosomatic medicine. 2016;78(7):851–60.

50. Muchiri JW, Gericke GJ, Rheeder P. Effect of a nutrition education programme on clinical status and dietary behaviours of adults with type 2 diabetes in a resource-limited setting in South Africa: a randomised controlled trial. Public Health Nutrition. 2016 Jan 1;19(1):142–55.

51. Muchiri JW, Rheeder P, Gericke GJ, University of Pretoria SA. Impact of nutrition education on diabetes knowledge and attitudes of adults with type 2 diabetes living in a resource-limited setting in South Africa : a randomised controlled trial. Journal of Endocrinology, Metabolism and Diabetes of South Africa. 2016 Jan 1;21(2):26–34.

52. Muchiri J, Gericke G, Rheeder P. Subjects’ experiences of a nutrition education programme: a qualitative study of adults with type 2 diabetes mellitus living in a rural resource-limited setting in South Africa. South African Journal of Clinical Nutrition. 2016 Jan 1;29(2):83–9.

53. Najafi F, Nalini M. Hospital-based versus hybrid cardiac rehabilitation program in coronary bypass surgery patients in western Iran: effects on exercise capacity, risk factors, psychological factors, and quality of life. Journal of Cardiopulmonary Rehabilitation & Prevention. 2015;35(1):29–36.

54. Nalini M. Outpatient cardiac rehabilitation use after coronary bypass surgery in the west of Iran. Journal of Cardiopulmonary Rehabilitation & Prevention. 2014;34(4):263–70.

55. Naser A, Shahamfar J, Kumar GV, Daga MK, Hadi HS, Saeed D, et al. Cardiac risk factor changes through an intensive multifactorial life style modification program in CHD patients: Results from a two year follow up. Journal of Biological Sciences. 2008;8(2):248–57.

56. Pande A, Singhal P, Kumar R, Gaur SN. Effect of home-based pulmonary rehabilitation programme on disability in patients with chronic obstructive pulmonary disease. Indian Journal of Chest Diseases & Allied Sciences. 2005;47(3):217–9.

57. Pandian JD, Felix C, Kaur P, Sharma D, Julia L, Toor G, et al. FAmily-Led RehabiliTaTion aftEr Stroke in INDia: The ATTEND pilot study. International Journal of Stroke. 2015;10(4):609–14.

58. Puckree T, Naidoo P. Balance and stability-focused exercise program improves stability and balance in patients after acute stroke in a resource-poor setting. PM & R. 2014;6(12):1081–7.

59. Raghuram N, Parachuri VR, Swarnagowri MV, Babu S, Chaku R, Kulkarni R, et al. Yoga based cardiac rehabilitation after coronary artery bypass surgery: One-year results on LVEF, lipid profile and psychological states - A randomized controlled study. Indian heart journal. 2014;66(5):490–502.

60. Ramirez M, Wu S. Phone Messaging to Prompt Physical Activity and Social Support Among Low-Income Latino Patients With Type 2 Diabetes: A Randomized Pilot Study. JMIR diabetes. 2017 Jun 6;2(1):e8.

61. Ranjita R, Hankey A, Nagendra HR, Mohanty S. Yoga-based pulmonary rehabilitation for the management of dyspnea in coal miners with chronic obstructive pulmonary disease: A randomized controlled trial. Journal of Ayurveda and Integrative Medicine. 2016;7(3):158–66.

62. Rifaat N, Anwar E, Ali YM, Ellabban A, Hasan AA. Value of pulmonary rehabilitation in patients with idiopathic pulmonary fibrosis. Egyptian journal of chest diseases and tuberculosis. 2014;63(4):1013–7.

63. Sadeghi M, Ghashghaei FE, Rabiei K, Roohafza H, Afshar H. Is there any difference between non-obese male and female in response to cardiac rehabilitation programs? Journal of Research in Medical Sciences. 2012;17(8):787–91.

64. Sarfo FS, Adusei N, Ampofo M, Kpeme FK, Ovbiagele B. Pilot trial of a tele-rehab intervention to improve outcomes after stroke in Ghana: A feasibility and user satisfaction study. J Neurol Sci. 2018 Apr 15;387:94–7.

65. Shah VO, Carroll C, Mals R, Ghahate D, Bobelu J, Sandy P, et al. A home-based educational intervention improves patient activation measures and diabetes health indicators among Zuni Indians. PLoS ONE. 2015;10 (5) (e0125820).

66. Shakil-Ur-Rehman S, Karimi H, Gillani SA. Effects of supervised structured aerobic exercise training program on fasting blood glucose level, plasma insulin level, glycemic control, and insulin resistance in type 2 diabetes mellitus. Pakistan Journal of Medical Sciences. 2017;33(3):576–80.

67. Sindhwani G, Verma A, Biswas D, Srivastava M, Rawat J. A pilot study on domiciliary pulmonary rehabilitation programme in the management of severe chronic obstructive pulmonary disease. Singapore Medical Journal. 2011;52(9):689–93.

68. Singh V, Khandelwal DC, Khandelwal R, Abusaria S. Pulmonary rehabilitation in patients with chronic obstructive pulmonary disease. Indian Journal of Chest Diseases & Allied Sciences. 2003;45(1):13–7.

69. Spencer L. Pulmonary rehabilitation for patients with acute chronic obstructive pulmonary disease exacerbations: Is the evidence strengthening? Current Opinion in Pulmonary Medicine. 2018 Mar 1;24(2):147–51.

70. Suseelal T, John KR, Brown A, Judie A, Christopher Amalraj V. A study to assess the effectiveness of home based aerobic training, muscle strengthening and stretching exercise on self management among individuals with diabetes mellitus (DM) at selected villages in Kancheepuram district, Tamil Nadu. International Journal of Pharmaceutical and Clinical Research. 2016;8(2):133–6.

71. Toufan M, Afrasiabi A. Benefits of cardiac rehabilitation on lipid profile in patients with coronary artery disease. Pakistan Journal of Biological Sciences. 2009;12(19):1307–13.

72. van Rooijen AJ, Rheeder P, Eales CJ, Becker PJ. Effect of exercise versus relaxation on haemoglobin A1C in Black females with type 2 diabetes mellitus. QJM : monthly journal of the Association of Physicians. 2004;97(6):343–51.

73. Wang J, Cai C, Padhye N, Orlander P, Zare M. A Behavioral Lifestyle Intervention Enhanced With Multiple-Behavior Self-Monitoring Using Mobile and Connected Tools for Underserved Individuals With Type 2 Diabetes and Comorbid Overweight or Obesity: Pilot Comparative Effectiveness Trial. JMIR mHealth and uHealth. 2018 Apr 10;6(4):e92.

74. Wattana C, Srisuphan W, Pothiban L, Upchurch SL. Effects of a diabetes self-management program on glycemic control, coronary heart disease risk, and quality of life among Thai patients with type 2 diabetes. Nursing & health sciences. 2007;9(2):135–41.

75. Wayne N, Perez DF, Kaplan DM, Ritvo P. Health Coaching Reduces HbA1c in Type 2 Diabetic Patients From a Lower-Socioeconomic Status Community: A Randomized Controlled Trial. J Med Internet Res. 2015 Oct 5;17(10):e224.

76. Wiyono WH, Riyadi J, Yunus F, Ratnawati A, Prasetyo S. The benefit of pulmonary rehabilitation against quality of life alteration and functional capacity of chronic obstructive pulmonary disease (COPD) patient assessed using St George’s respiratory questionnaire (SGRQ) and 6 minutes walking distance test(6MWD). Medical journal of indonesia. 2006;15(3):165–72.

77. Yadav A, Singh S, Singh K, Pai P. Effect of yoga regimen on lung functions including diffusion capacity in coronary artery disease patients: A randomized controlled study. International Journal of Yoga. 2015;8(1):62–7.

78. Yadav RK, Sharma R, Borah D, Kothari SY. Efficacy of modified constraint induced movement therapy in the treatment of hemiparetic upper limb in stroke patients: A randomized controlled trial. Journal of Clinical and Diagnostic Research. 2016;10(11):YC01–5.

79. Yogendra J, Yogendra HJ, Ambardekar S, Lele RD, Shetty S, Dave M, et al. Beneficial effects of yoga lifestyle on reversibility of ischaemic heart disease: caring heart project of International Board of Yoga. J Assoc Physicians India. 2004 Apr;52:283–9.

80. Zhang L, Zhang L, Wang J, Ding F, Zhang S. Community health service center-based cardiac rehabilitation in patients with coronary heart disease: a prospective study. BMC health services research. 2017;17(1):128.

81. Zhou B, Zhang J, Zhao Y, Li X, Anderson CS, Xie B, et al. Caregiver-Delivered Stroke Rehabilitation in Rural China: The RECOVER Randomized Controlled Trial. Stroke. 2019;50(7):1825–30.

82. Anastasaki M, Trigoni M, Pantouvaki A, Trouli M, Mavrogianni M, Chavannes N, et al. Establishing a pulmonary rehabilitation programme in primary care in Greece: A FRESH AIR implementation study. Chronic Respiratory Disease. 2019 Nov 15;16.

83. Servio T, Britto R, Ghisi G, da Silva L, Silva L, Lima M, et al. Barriers to cardiac rehabilitation delivery in a low-resource setting from the perspective of healthcare administrators, rehabilitation providers, and cardiac patients. BMC Health Services Research. 2019 Sep 2;19(1).

84. Prabhakaran D, Chandrasekaran AM, Singh K, Mohan B, Chattopadhyay K, Chadha DS, et al. Yoga-Based Cardiac Rehabilitation After Acute Myocardial Infarction: A Randomized Trial. J Am Coll Cardiol. 2020 Apr 7;75(13):1551–61.

85. Satyamurthy A, Prabhu N, Padmakumar R, Babu A. Feasibility of an exercise-based cardiac rehabilitation algorithm in patients following percutaneous coronary intervention for acute coronary syndrome. Indian Heart Journal. 2020 Jul;72(4):289–92.

86. Philip K, Cartwright L, Westlake D, Nyakoojo G, Kimuli I, Kirenga B, et al. Music and dance in respiratory disease management in Uganda: a qualitative study of patient and healthcare professional perspectives. BMJ Open. 2021 Sep;11(9).

87. Hughes C, Mariscal T, Baye M, Belay G, Hintze A, Padilla A, et al. Development of an Upper Extremity Stroke Rehabilitation mHealth Application for sub-Saharan Africa: A Usability Study. In 2019 IST-Africa Week Conference (IST-Africa), pp. 1-8. IEEE, 2019.

88. Mahmood A, Blaizy V, Verma A, Sequeira JS, Saha D, Ramachandran S, et al. Acceptability and attitude towards a mobile-based home exercise program among stroke survivors and caregivers: A cross-sectional study. International Journal of Telemedicine and Applications [Internet]. 2019;2019.

89. Harzand A, Vakili A, Alrohaibani A, Abdelhamid S, Gordon N, Thiel J, et al. Rationale and design of a smartphone-enabled, home-based exercise program in patients with symptomatic peripheral arterial disease: The smart step randomized trial. Clinical Cardiology. 2020 Jun;43(6):537–45.

90. Podvorica E, Bekteshi T, Oruqi M, Kalo I. Education of the Patients Living with Heart Disease. Mater Sociomed. 2021 Mar;33(1):10–5.

91. Suryani M, Samekto W, Heri-Nugroho, Susanto H, Dwiantoro L. Effect of foot-ankle flexibility and resistance exercise in the secondary prevention of plantar foot diabetic ulcer. J Diabetes Complications. 2021 Sep;35(9):107968.

92. Odetunde MO, Binuyo OT, Maruf FA, Ayenowowon SO, Okonji AM, Odetunde NA, et al. Development and Feasibility Testing of Video Home Based Telerehabilitation for Stroke Survivors in Resource Limited Settings. Int J Telerehabil. 2020 Dec 8;12(2):125–36.

93. Murad S, Siddiqi FA, Tariq MI, Butt MW. Effects Of Cardiovascular Conditioning Exercises On Quality Of Life In Patients With Dilated Ardiomyopathy In Pakistan. J Ayub Med Coll Abbottabad. 2019 Dec;31(Suppl 1)(4):S651–5.

94. Scheffler E, Mash R. Figuring it out by yourself: Perceptions of home-based care of stroke survivors, family caregivers and community health workers in a low-resourced setting, South Africa. African Journal Of Primary Health Care & Family Medicine. 2020 Oct 8;12(1).

95. da Cruz MMA, Ricci-Vitor AL, Borges GLB, da Silva PF, Turri-Silva N, Takahashi C, et al. A Randomized, Controlled, Crossover Trial of Virtual Reality in Maintenance Cardiovascular Rehabilitation in a Low-Resource Setting: Impact on Adherence, Motivation, and Engagement. Phys Ther. 2021 May 4;101(5).

96. Ain QU, Khan S, Ilyas S, Yaseen A, Tariq I, Liu T, et al. Additional Effects of Xbox Kinect Training on Upper Limb Function in Chronic Stroke Patients: A Randomized Control Trial. Healthcare (Basel). 2021 Feb 24;9(3).

97. Solanki D, Lahiri U. Adaptive Treadmill-Assisted Virtual Reality-Based Gait Rehabilitation for Post-Stroke Physical Reconditioning - A Feasibility Study in Low-Resource Settings. IEEE Access. 2020;8:88830–43.

98. Ahmad I, Verma S, Noohu MM, Hussain ME. Effect of sensorimotor training on spatiotemporal parameters of gait among middle and older age adults with diabetic peripheral neuropathy. Somatosens Mot Res. 2021 Sep;38(3):230–40.

99. Orooj M, Moiz JA, Mujaddadi A, Ali MS, Talwar D. Effect of Pulmonary Rehabilitation in Patients with Asthma COPD Overlap Syndrome: A Randomized Control Trial. Oman Med J. 2020 May;35(3):e136.

100. Rangel-Cubillos DM, Vega-Silva AV, Corzo-Vargas YF, Molano-Tordecilla MC, Peñuela-Arévalo YP, Lagos-Peña KM, et al. Examining Facilitators and Barriers to Cardiac Rehabilitation Adherence in a Low-Resource Setting in Latin America from Multiple Perspectives. International Journal of Environmental Research and Public Health [Internet]. 2022;19(4).

101. Ngeno GTK, Barasa F, Kamano J, Kwobah E, Wambui C, Binanay C, et al. Feasibility of Cardiac Rehabilitation Models in Kenya. Annals of Global Health [Internet]. 2022;88(1).

102. Borges GLB, da Cruz MMA, Ricci-Vitor AL, da Silva PF, Grace SL, Vanderlei LCM. Publicly versus privately funded cardiac rehabilitation: access and adherence barriers. A cross-sectional study. Sao Paulo Medical Journal. 2022;140(1):108–14.

103. Mutagwanya R, Nyago CM, Nakwagala FN. Effect of diabetes nutrition education on the dietary feeding practices and lifestyle of type 2 diabetic patients. Eur J Clin Nutr. 2022 Feb;76(2):270–6.

104. Christa E, Srivastava P, Chandran DS, Jaryal AK, Yadav RK, Roy A, et al. Effect of Yoga-Based Cardiac Rehabilitation on Heart Rate Variability: Randomized Controlled Trial in Patients Post-MI. Int J Yoga Therap. 2019 Nov;29(1):43–50.

105. Uddin J, Joshi VL, Moniruzzaman M, Karim R, Uddin J, Siraj M, et al. Effect of Home-Based Cardiac Rehabilitation in a Lower-Middle Income Country: RESULTS FROM A CONTROLLED TRIAL. J Cardiopulm Rehabil Prev. 2020 Jan;40(1):29–34.

106. El Missiri A, Amin SA, Tawfik IR, Shabana AM. Effect of a 6-week and 12-week cardiac rehabilitation program on heart rate recovery. Egypt Heart J. 2020 Oct 14;72(1):69.

107. Abdullahi A. Number of repetition versus hours of shaping practice duringconstraint-induced movement therapy in acute stroke: a randomised controlled trial protocol. European Journal of Physiotherapy. 2017 Jul 3;19(3):173–6.

108. Mahmood A, Blaizy V, Verma A, Sequeira J, Saha D, Ramachandran S, et al. Acceptability and Attitude towards a Mobile-Based Home Exercise Program among Stroke Survivors and Caregivers: A Cross-Sectional Study. International Journal Of Telemedicine And Applications. 2019;2019.

109. Ain QU, Imran M, Bashir A, Malik AN. Progressive resistance training improving gait performance and mobility in acute and chronic stroke patients. J Pak Med Assoc. 2021 Jan;71(1(A)):140–2.

110. Niama Natta DD, Lejeune T, Detrembleur C, Yarou B, Sogbossi ES, Alagnidé E, et al. Effectiveness of a self-rehabilitation program to improve upper-extremity function after stroke in developing countries: A randomized controlled trial. Ann Phys Rehabil Med. 2021 Jan;64(1):101413.

111. Widayanti AW, Heydon S, Green JA, Norris P. Effectiveness of an intensive community-based intervention for people with type 2 diabetes in Indonesia: A pilot study. Diabetes Res Clin Pract. 2021 Nov;181:109087.

112. El Missiri AM, Awadalla HM, Almoudi MM. Gender differences among ischemic heart disease patients enrolled in a cardiac rehabilitation program. Egypt Heart J. 2020 Mar 30;72(1):15.

113. El Missiri A, Abdel Halim WA, Almaweri AS, Mohamed TR. Effect of a phase 2 cardiac rehabilitation program on obese and non-obese patients with stable coronary artery disease. Egypt Heart J. 2021 Jan 7;73(1):4.

114. Singh N, Saini M, Anand S, Kumar N, Srivastava M, Mehndiratta A. Robotic Exoskeleton for Wrist and Fingers Joint in Post-Stroke Neuro-Rehabilitation for Low-Resource Settings. IEEE Transactions On Neural Systems And Rehabilitation Engineering. 2019 Dec;27(12):2369–77.

115. Arjunan P, Trichur RV. The Impact of Nurse-Led Cardiac Rehabilitation on Quality of Life and Biophysiological Parameters in Patients With Heart Failure: A Randomized Clinical Trial. J Nurs Res. 2020 Oct 8;29(1):e130.

116. Kumar S, Yadav R, Aafreen. Comparison between Erigo tilt-table exercise and conventional physiotherapy exercises in acute stroke patients: a randomized trial. Arch Physiother. 2020;10:3.

117. Steinman L, Heang H, van Pelt M, Ide N, Cui H, Rao M, et al. Facilitators and Barriers to Chronic Disease Self-Management and Mobile Health Interventions for People Living With Diabetes and Hypertension in Cambodia: Qualitative Study. JMIR Mhealth Uhealth. 2020 Apr 24;8(4):e13536.

118. Johnson LCM, Thompson NJ, Ali MK, Tandon N, Chwastiak L, Mohan V. Factors that facilitate patient activation in the self-management of diabetes and depression among participants enrolled in an integrated chronic care model in India. Soc Sci Med. 2021 Feb;270:113646.

119. Premkumar S, Ramamoorthy L, Pillai AA. Impact of nurse-led cardiac rehabilitation on patient’s behavioral and physiological parameters after a coronary intervention: A pilot randomized controlled trial. J Family Community Med. 2022 Apr;29(1):17–23.

120. Muhoma T, Waruiru MW, Sanni O, Knecht LD, McFarland M. A quality improvement project to improve diabetes self-management and patient satisfaction in a low-resourced central Kenyan hospital. Afr Health Sci. 2020 Sep;20(3):1322–8.

121. Whittemore R, Vilar-Compte M, De La Cerda S, Marron D, Conover R, Delvy R, et al. Challenges to diabetes self-management for adults with type 2 diabetes in low-resource settings in Mexico City: a qualitative descriptive study. Int J Equity Health. 2019 Aug 23;18(1):133.

122. Dido YM, Dulo OA. Dynamic of upper limb sensorimotor recovery assessed on the fugl-meyer scale in post-stroke patients with neglect syndrome receiving combined physical therapy and ergotherapy. Wiad Lek. 2021;74(4):849–55.

123. Manzoor S, Hisam A, Aziz S, Mashhadi SF, Haq ZU. Effectiveness of Mobile Health Augmented Cardiac Rehabilitation on Behavioural Outcomes among Post-acute Coronary Syndrome Patients: A Randomised Controlled Trial. J Coll Physicians Surg Pak. 2021 Oct;31(10):1148–53.

124. Zhang P, Hu Y-D, Xing F-M, Li C-Z, Lan W-F, Zhang X-L. Effects of a nurse-led transitional care program on clinical outcomes, health-related knowledge, physical and mental health status among Chinese patients with coronary artery disease: A randomized controlled trial. International Journal of Nursing Studies. 2017 Sep;74:34–43.

125. Sharma KNS, Pailoor S, Choudhary NR, Bhat P, Shrestha S. Integrated Yoga Practice in Cardiac Rehabilitation Program: A Randomized Control Trial. J Altern Complement Med. 2020 Oct;26(10):918–27.

126. Sutantri S, Cuthill F, Holloway A. “A bridge to normal”: a qualitative study of Indonesian women’s attendance in a phase two cardiac rehabilitation programme. Eur J Cardiovasc Nurs. 2019 Dec;18(8):744–52.

127. Thuita AW, Kiage BN, Onyango AN, Makokha AO. Effect of a nutrition education programme on the metabolic syndrome in type 2 diabetes mellitus patients at a level 5 Hospital in Kenya: “a randomized controlled trial”. BMC Nutr. 2020;6:30.

128. Karthikbabu S, Verheyden G. Relationship between trunk control, core muscle strength and balance confidence in community-dwelling patients with chronic stroke. Top Stroke Rehabil. 2021 Mar;28(2):88–95.

129. Owolabi EO, Goon DT, Ajayi AI. Impact of mobile phone text messaging intervention on adherence among patients with diabetes in a rural setting: A randomized controlled trial. Medicine (Baltimore). 2020 Mar;99(12):e18953.

130. Hailu FB, Moen A, Hjortdahl P. Diabetes Self-Management Education (DSME) - Effect on Knowledge, Self-Care Behavior, and Self-Efficacy Among Type 2 Diabetes Patients in Ethiopia: A Controlled Clinical Trial. Diabetes Metab Syndr Obes. 2019;12:2489–99.

131. Samuel SR, Maiya AG, Fernandes DJ, Guddattu V, Saxena PUP, Kurian JR, et al. Effectiveness of exercise-based rehabilitation on functional capacity and quality of life in head and neck cancer patients receiving chemo-radiotherapy. Support Care Cancer. 2019 Oct;27(10):3913–20.

132. Ahmad I, Verma S, Noohu MM, Shareef MY, Hussain ME. Sensorimotor and gait training improves proprioception, nerve function, and muscular activation in patients with diabetic peripheral neuropathy: a randomized control trial. J Musculoskelet Neuronal Interact. 2020 Jun 1;20(2):234–48.

133. Daud SAH, Rahman MU, Arsh A, Junaid M. Effect of balance training with Biodex Balance System to improve balance in patients with diabetic neuropathy: A quasi experimental study. Pak J Med Sci. 2021 Apr;37(2):389–92.

134. Viswanathan V, Sivakumar S, Sai Prathiba A, Devarajan A, George L, Kumpatla S. Effect of yoga intervention on biochemical, oxidative stress markers, inflammatory markers and sleep quality among subjects with type 2 diabetes in South India: Results from the SATYAM project. Diabetes Res Clin Pract. 2021 Feb;172:108644.

135. Radhika J, Poomalai G, Nalini S, Revathi R. Effectiveness of Buerger-Allen Exercise on Lower Extremity Perfusion and Peripheral Neuropathy Symptoms among Patients with Diabetes Mellitus. Iran J Nurs Midwifery Res. 2020 Aug;25(4):291–5.

136. Vinitha R, Nanditha A, Snehalatha C, Satheesh K, Susairaj P, Raghavan A, et al. Effectiveness of mobile phone text messaging in improving glycaemic control among persons with newly detected type 2 diabetes. Diabetes Res Clin Pract. 2019 Dec;158:107919.

137. Rahul A, Chintha S, Anish TS, Prajitha KC, Indu PS. Effectiveness of a Non-pharmacological Intervention to Control Diabetes Mellitus in a Primary Care Setting in Kerala: A Cluster-Randomized Controlled Trial. Front Public Health. 2021;9:747065.

138. Mphwanthe G, Carolan M, Earnesty D, Weatherspoon L. Perceived barriers and facilitators to diet and physical activity among adults diagnosed with type 2 diabetes in Malawi. Glob Public Health. 2021 Mar;16(3):469–84.

139. Kamel FH, Basha MA, Alsharidah AS, Salama AB. Resistance Training Impact on Mobility, Muscle Strength and Lean Mass in Pancreatic Cancer Cachexia: A Randomized Controlled Trial. Clin Rehabil. 2020 Nov;34(11):1391–9.

140. Thanh HTK, Tien TM. Effect of Group Patient Education on Glycemic Control Among People Living with Type 2 Diabetes in Vietnam: A Randomized Controlled Single-Center Trial. Diabetes Ther. 2021 May;12(5):1503–21.

141. Dhawan S, Andrews R, Kumar L, Wadhwa S, Shukla G. A Randomized Controlled Trial to Assess the Effectiveness of Muscle Strengthening and Balancing Exercises on Chemotherapy-Induced Peripheral Neuropathic Pain and Quality of Life Among Cancer Patients. Cancer Nurs. 2020 Aug;43(4):269–80.

142. Basha MA, Aboelnour NH, Alsharidah AS, Kamel FH. Effect of exercise mode on physical function and quality of life in breast cancer-related lymphedema: a randomized trial. Support Care Cancer. 2022 Mar;30(3):2101–10.

143. Mohamed MT, Embaby EA, Labib A, El-Husseiny M, Khamis H, El-Demery A, et al. Effects of exercise in combination with autologous bone marrow stem cell transplantation for patients with type 1 diabetes. Physiother Theory Pract. 2019 Dec;35(12):1233–42.

144. Mohamed BA, Mahfouz MS, Badr MF. Physical activity and its associated factors in females with type 2 diabetes in Riyadh, Saudi Arabia. PLoS One. 2020;15(10):e0239905.
